# Supplementary material for: Mesoporous-Layered Double Oxide/MCM-41 Composite with Enhanced Catalytic Performance for Cyclopentanone Aldol Condensation
Source: MDPI journal article supplement (doi:10.3390/molecules28237920), 2023-12-03
Supplement: s1 [file s1]

# **Mesoporous layered double oxide/MCM-41 composite with enhanced catalytic performance for cyclopentanone aldol condensation**

Jinfan Yang<sup>a\*</sup>, Ning Shang<sup>a</sup>, Jiachen Wang<sup>a</sup>, Huimin Liu<sup>a</sup>

<sup>a</sup> College of Bioresources Chemical and Materials Engineering, Shaanxi University of Science & Technology, Xi'an 710021, China

\*Corresponding author: Dr. Jinfan Yang

College of Bioresources Chemical and Materials Engineering

Shaanxi University of Science & Technology

Xi'an, Shaanxi, 710021, China

Tel.: +86-029-86168575; Fax: + 86-029-86168575;

E-mail: yangjinfan@sust.edu.cn

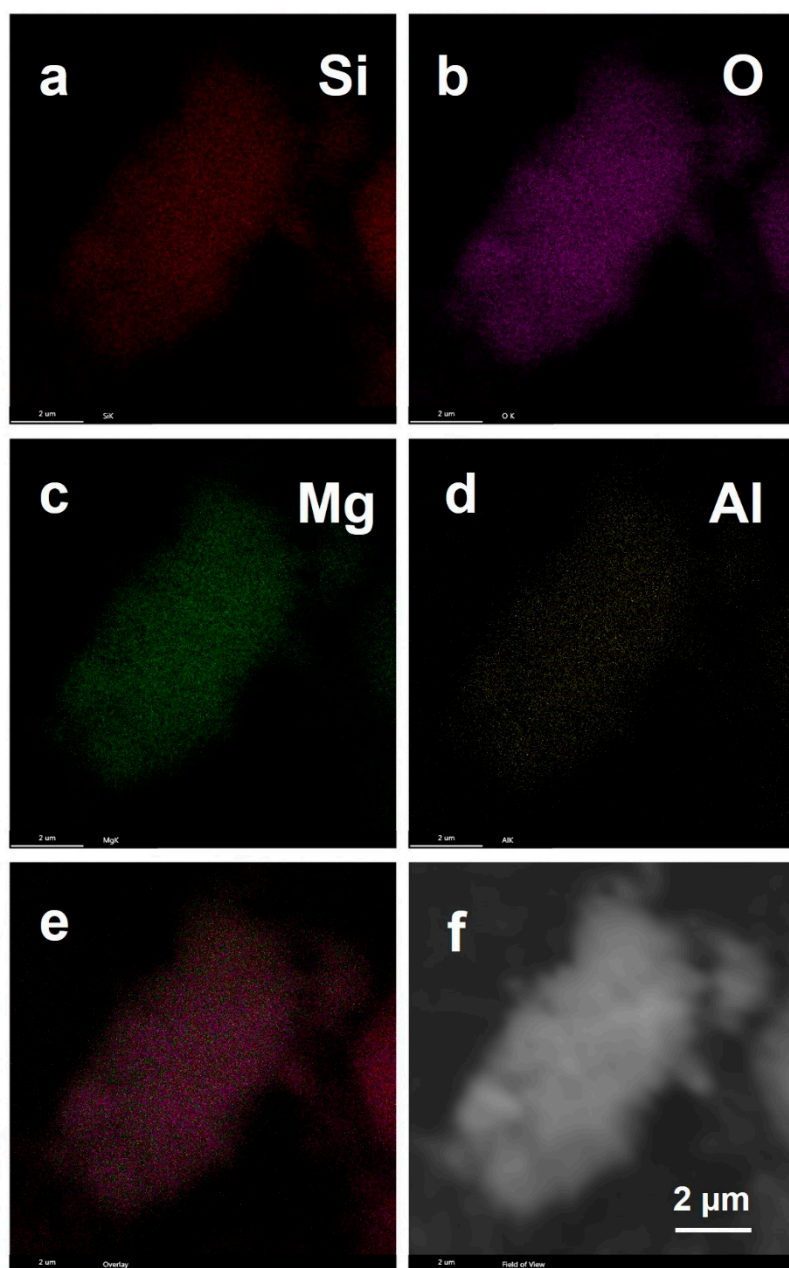

**Figure S1.** SEM-EDX mapping of LDO/MCM-41 (a) Si (b) O (c) Mg (d) Al (e)

Merged image (f) SEM of mapped region.

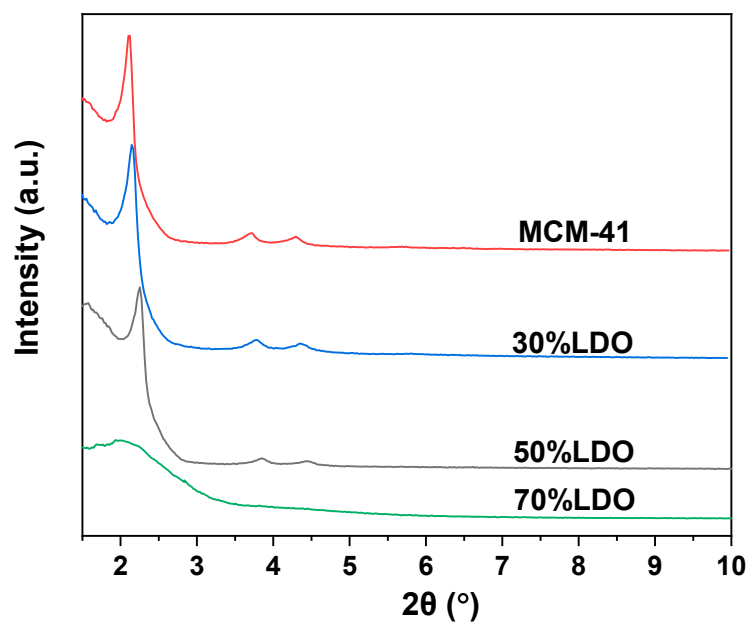

**Figure S2** Low angle XRD patterns of LDO/MCM-41 composites with different LDO loading.

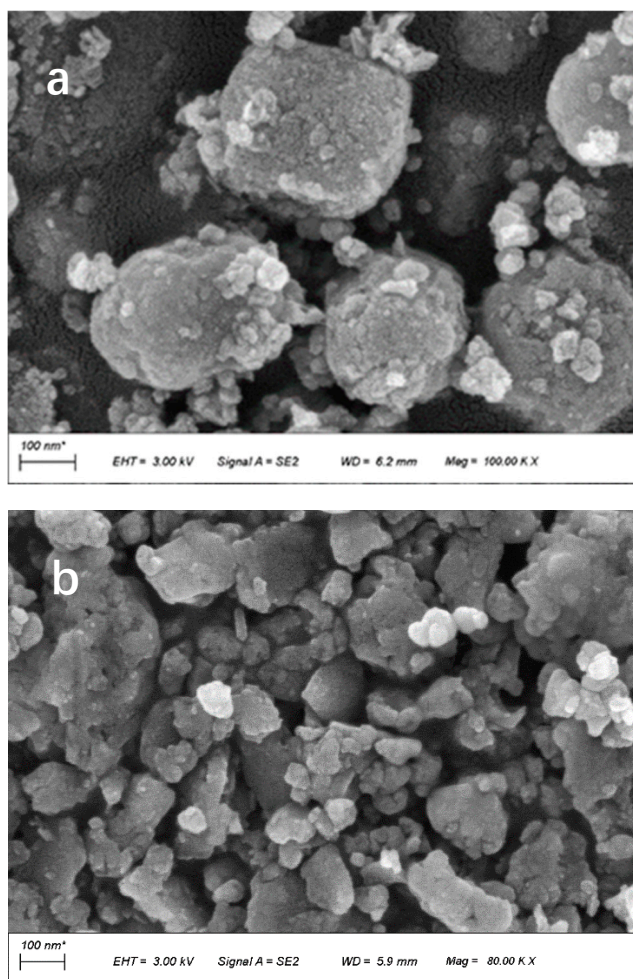

**Figure S3** SEM images of (a) 30LDO/MCM-41, and (b) 70LDO/MCM-41.

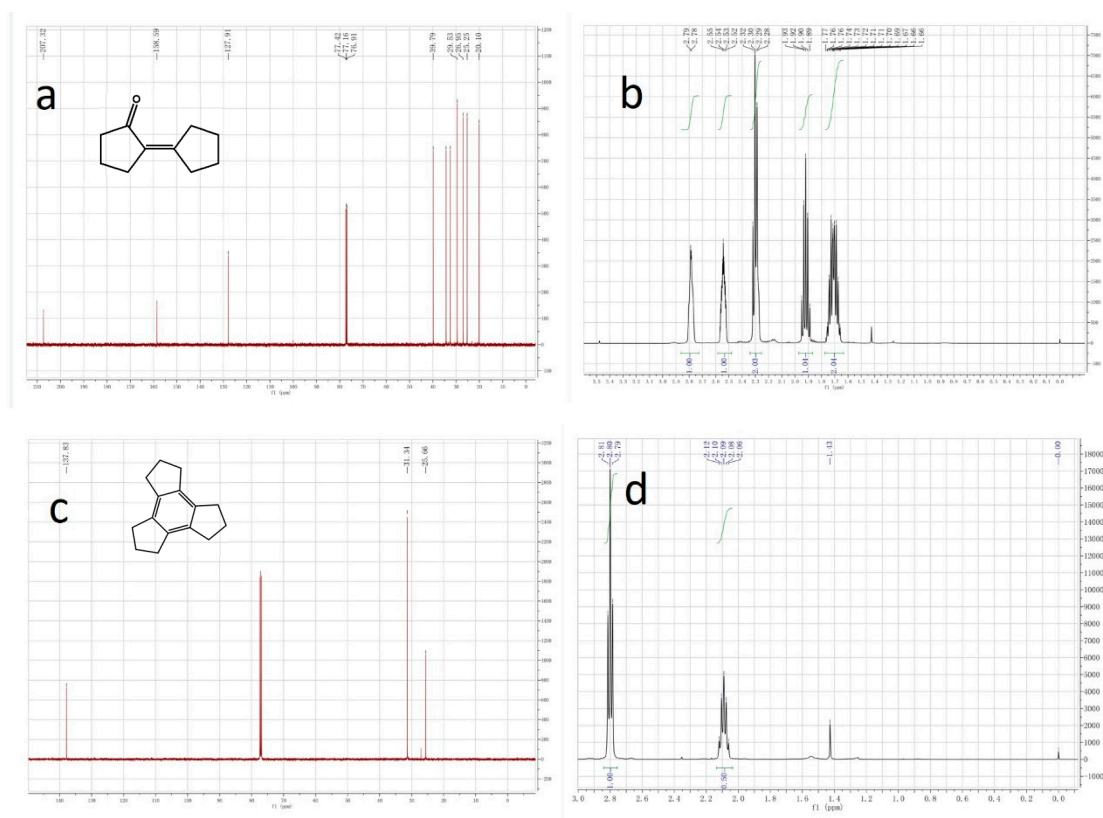

**Figure S4.** Nuclear magnetic resonance spectroscopy of (a-b) C10 and (c-d) C15 oxygenates.

**Table S1** The acid-base properties and catalytic performance of LDO/MCM-41 composites with different LDO loadings.

| LDO<br>loading<br>(%) | Base amount (mmol g <sup>-1</sup> ) |        |        |       | Conver<br>sion<br>(%) | Yield (%) |      | Select<br>ivity<br>(%) |
|-----------------------|-------------------------------------|--------|--------|-------|-----------------------|-----------|------|------------------------|
|                       | Weak                                | Medium | Strong | Total |                       | C10       | C15  |                        |
|                       |                                     |        |        |       |                       |           |      |                        |
| 30                    | 0.04                                | 0.11   | 0.05   | 0.20  | 56.3                  | 48.6      | 6.1  | 97.1                   |
| 50                    | 0.06                                | 0.25   | 0.12   | 0.43  | 77.8                  | 60.0      | 15.2 | 96.6                   |
| 70                    | 0.13                                | 0.16   | 0.27   | 0.56  | 89.0                  | 65.5      | 13.0 | 88.2                   |
